# Supplementary material for: Key miRNAs and Genes in the High-Altitude Adaptation of Tibetan Chickens
Source: Front Vet Sci. 2022 Jul 14;9:911685. doi: 10.3389/fvets.2022.911685 (PMC9330022; doi:10.3389/fvets.2022.911685)
Supplement: Supplementary file 2 [file Table_1.xlsx]

## Sheet: Sheet1
Table S2. Novel miRNAs predicted by miRDeep2
Provisional id	miRDeep2 score	Estimated probability that the miRNA candidate is a true positive	Rfam alert	Total read count	Mature read count	Loop read count	Star read count	Significant randfold p-value	miRBase miRNA	Example miRBase miRNA with the same seed	UCSC browser	NCBI blastn	Consensus mature sequence	Consensus star sequence	Consensus precursor sequence
chr7_11125	755839	83 +/- 11%	-	1482536	1480868	0	1668	yes	-	tgu-miR-26-5p	-	-	uucaaguaauccaggauaggc	ccuguucuagguuacuuggcuc	uucaaguaauccaggauaggcuguggucuggcagucagccuguucuagguuacuuggcuc
chr2_2366	755223	83 +/- 11%	-	1481328	1481131	0	197	yes	-	tgu-miR-26-5p	-	-	uucaaguaauccaggauaggc	ccuauucuugguuacuugcac	uucaaguaauccaggauaggcuguauccauuccugcuggccuauucuugguuacuugcac
chr2_4638	755223	83 +/- 11%	-	1481328	1481131	0	197	yes	-	tgu-miR-26-5p	-	-	uucaaguaauccaggauaggc	ccuauucuugguuacuugcac	uucaaguaauccaggauaggcuguauccauuccugcuggccuauucuugguuacuugcac
chr19_4456	571579	83 +/- 11%	-	1121125	1120031	1	1093	yes	-	-	-	-	aagcugccaguugaagaacug	aguucuucaguggcaagcuu	aguucuucaguggcaagcuuuauguccuucucuaguagcuaaagcugccaguugaagaacug
chr19_2282	571579	83 +/- 11%	-	1121125	1120031	1	1093	yes	-	-	-	-	aagcugccaguugaagaacug	aguucuucaguggcaagcuu	aguucuucaguggcaagcuuuauguccuucucuaguagcuaaagcugccaguugaagaacug
chr2_5054	377168	83 +/- 11%	-	739790	738585	0	1205	yes	-	tgu-miR-148a-3p	-	-	ucagugcacuacagaacuuug	aaaguucugugacacucagac	aaaguucugugacacucagacucugguuacgauagcagucagugcacuacagaacuuug
chr2_2634	377168	83 +/- 11%	-	739790	738585	0	1205	yes	-	tgu-miR-148a-3p	-	-	ucagugcacuacagaacuuug	aaaguucugugacacucagac	aaaguucugugacacucagacucugguuacgauagcagucagugcacuacagaacuuug
chr17_2038	270392	83 +/- 11%	-	530354	366790	0	163564	yes	-	tgu-miR-126-3p	-	-	ucguaccgugaguaauaaugcg	cauuauuacuuuugguacgcg	cauuauuacuuuugguacgcgcugugacacuucaaacucguaccgugaguaauaaugcg
chr17_3822	270392	83 +/- 11%	-	530354	366790	0	163564	yes	-	tgu-miR-126-3p	-	-	ucguaccgugaguaauaaugcg	cauuauuacuuuugguacgcg	cauuauuacuuuugguacgcgcugugacacuucaaacucguaccgugaguaauaaugcg
chrW_12431	226671	83 +/- 11%	-	444596	437670	0	6926	yes	-	tgu-miR-122-5p	-	-	uggagugugacaaugguguuug	aacgccauuaucacacuaaa	uggagugugacaaugguguuuguguccaaucuaucaaacgccauuaucacacuaaa
chrZ_12460	226496	83 +/- 11%	-	444253	437327	0	6926	yes	-	tgu-miR-122-5p	-	-	uggagugugacaaugguguuug	aacgccauuaucacacuaaa	uggagugugacaaugguguuuguguccaaucuaucaaacgccauuaucacacuaaa
chr1_356	119080	83 +/- 11%	-	233561	231945	6	1610	yes	-	tgu-let-7i-5p	-	-	ugagguaguagguuguauagu	cuauacaaucuacugucuuuc	ugagguaguagguuguauaguuuuaggguuaugcccugccugucagauaacuauacaaucuacugucuuuc
chr26_6269	118451	83 +/- 11%	-	232328	231815	0	513	yes	-	tgu-let-7i-5p	-	-	ugagguaguagguuguauagu	cuauacagucuauugccuucc	ugagguaguagguuguauaguuuggugggagggauucugucccauuucaggugauaacuauacagucuauugccuucc
chr26_3193	118451	83 +/- 11%	-	232328	231815	0	513	yes	-	tgu-let-7i-5p	-	-	ugagguaguagguuguauagu	cuauacagucuauugccuucc	ugagguaguagguuguauaguuuggugggagggauucugucccauuucaggugauaacuauacagucuauugccuucc
chr24_5938	118440	83 +/- 11%	-	232306	232213	0	93	yes	-	tgu-let-7i-5p	-	-	ugagguaguagguuguauagu	cuguacaaccuccuagcuuucc	ugagguaguagguuguauaguuuagaauuacaccaagggagauaacuguacaaccuccuagcuuucc
chr24_3084	118440	83 +/- 11%	-	232306	232213	0	93	yes	-	tgu-let-7i-5p	-	-	ugagguaguagguuguauagu	cuguacaaccuccuagcuuucc	ugagguaguagguuguauaguuuagaauuacaccaagggagauaacuguacaaccuccuagcuuucc
chr19_2236	114340	83 +/- 11%	-	224263	220752	0	3511	yes	-	tgu-miR-21-5p	-	-	uagcuuaucagacugauguugac	caacaacagucgguaggcuguc	uagcuuaucagacugauguugacuguuggaucucauggcaacaacagucgguaggcuguc
chr19_4350	114340	83 +/- 11%	-	224263	220752	0	3511	yes	-	tgu-miR-21-5p	-	-	uagcuuaucagacugauguugac	caacaacagucgguaggcuguc	uagcuuaucagacugauguugacuguuggaucucauggcaacaacagucgguaggcuguc
chr26_3195	100319	83 +/- 11%	-	196763	195155	0	1608	yes	-	tgu-let-7i-5p	-	-	ugagguaguagauugaauagu	cuauacaaucuacugucuuuc	ugagguaguagauugaauaguuguggaguccuauccucccuuugagcuaacuauacaaucuacugucuuuc
chr26_6271	100319	83 +/- 11%	-	196763	195155	0	1608	yes	-	tgu-let-7i-5p	-	-	ugagguaguagauugaauagu	cuauacaaucuacugucuuuc	ugagguaguagauugaauaguuguggaguccuauccucccuuugagcuaacuauacaaucuacugucuuuc
chr24_5940	91947.6	83 +/- 11%	-	180343	180026	0	317	yes	-	tgu-miR-125-5p	-	-	ucccugagacccuaacuuguga	acggguuaggcucuugggagc	ucccugagacccuaacuugugauguuuagcuuuuaaauccacggguuaggcucuugggagc
chr24_3086	91947.6	83 +/- 11%	-	180343	180026	0	317	yes	-	tgu-miR-125-5p	-	-	ucccugagacccuaacuuguga	acggguuaggcucuugggagc	ucccugagacccuaacuugugauguuuagcuuuuaaauccacggguuaggcucuugggagc
chr1_636	91872.2	83 +/- 11%	-	180195	179443	0	752	yes	-	tgu-miR-125-5p	-	-	ucccugagacccuaacuuguga	acaagucaggcucuugggac	ucccugagacccuaacuugugagguuuuguagcaacaaucacaagucaggcucuugggac
chr23_5794	81183.8	83 +/- 11%	-	159229	154119	0	5110	yes	-	tgu-miR-30b-5p	-	-	uguaaacauccuugacuggaagc	cuuucagucggauguuuacagc	uguaaacauccuugacuggaagcugugaggugucagcgggggcuuucagucggauguuuacagc
chr23_3008	81183.8	83 +/- 11%	-	159229	154119	0	5110	yes	-	tgu-miR-30b-5p	-	-	uguaaacauccuugacuggaagc	cuuucagucggauguuuacagc	uguaaacauccuugacuggaagcugugaggugucagcgggggcuuucagucggauguuuacagc
chr1_1588	75790.5	83 +/- 11%	-	148651	148485	0	166	yes	-	tgu-miR-363-3p	-	-	uauugcacuugucccggccug	agguugggaucaguugcaaugc	agguugggaucaguugcaaugcugugcguuucugugguauugcacuugucccggccug
chr4_9112	69237.9	83 +/- 11%	-	135798	135796	0	2	yes	-	tgu-miR-363-3p	-	-	uauugcacuugucccggccug	ggguggggauuuguugcauuacu	ggguggggauuuguugcauuacuuguagcuguguguagaguauugcacuugucccggccug
chr2_2827	53444.2	83 +/- 11%	-	104820	103613	0	1207	yes	-	tgu-miR-30b-5p	-	-	uguaaacauccccgacuggaagc	uuucagucagauguuugcugc	uguaaacauccccgacuggaagcuguagcagcuugagcuuucagucagauguuugcugc
chr2_5401	53444.2	83 +/- 11%	-	104820	103613	0	1207	yes	-	tgu-miR-30b-5p	-	-	uguaaacauccccgacuggaagc	uuucagucagauguuugcugc	uguaaacauccccgacuggaagcuguagcagcuugagcuuucagucagauguuugcugc
chrZ_12719	42414.9	83 +/- 11%	-	83186	82706	1	479	yes	-	tgu-miR-2954-3p	-	-	cauccccauuccacuccuagcag	ugcugagagggcuuggggagagga	ugcugagagggcuuggggagaggauuguaguggagcuccauccccauuccacuccuagcag
chr1_63	35068	83 +/- 11%	-	68777	68246	0	531	yes	-	tgu-miR-29a-3p	-	-	uagcaccauuugaaaucgguua	acugauuucuuuugguguucag	acugauuucuuuugguguucagagucaauaauauuuucuagcaccauuugaaaucgguua
chr19_4512	28129.9	83 +/- 11%	-	55167	53701	0	1466	yes	-	tgu-miR-130a-3p	-	-	cagugcaauguuaaaagggca	gcccuuuuuauguuguacuac	gcccuuuuuauguuguacuacuagugaucauacacaaagcagugcaauguuaaaagggca
chr19_2324	28129.9	83 +/- 11%	-	55167	53701	0	1466	yes	-	tgu-miR-130a-3p	-	-	cagugcaauguuaaaagggca	gcccuuuuuauguuguacuac	gcccuuuuuauguuguacuacuagugaucauacacaaagcagugcaauguuaaaagggca
chr3_7262	27423	83 +/- 11%	-	53780	51760	0	2020	yes	-	tgu-miR-30b-5p	-	-	uguaaacauccucgacuggaagc	cuuucagucggauguuugcagc	uguaaacauccucgacuggaagcugugaagcagcagauggggcuuucagucggauguuugcagc
chr23_5796	20324.8	83 +/- 11%	-	39858	36556	0	3302	yes	-	tgu-miR-30b-5p	-	-	uguaaacauccuacacucucagc	ugggagaggauuguuuacgcc	uguaaacauccuacacucucagcugugaacucgagguggcugggagaggauuguuuacgcc
chr23_3010	20324.8	83 +/- 11%	-	39858	36556	0	3302	yes	-	tgu-miR-30b-5p	-	-	uguaaacauccuacacucucagc	ugggagaggauuguuuacgcc	uguaaacauccuacacucucagcugugaacucgagguggcugggagaggauuguuuacgcc
chr3_7264	19098.8	83 +/- 11%	-	37453	36570	0	883	yes	-	tgu-miR-30b-5p	-	-	uguaaacauccuacacucucagc	cugggagaaggcuguuuacuc	uguaaacauccuacacucucagcuguggaaacuaagaaagcugggagaaggcuguuuacuc
chr7_10963	16711.1	83 +/- 11%	-	32770	32720	0	50	yes	-	tgu-miR-128-3p	-	-	ucacagugaaccggucucuu	cggggccguaacacugucugag	cggggccguaacacugucugagagguuuauauuucucacagugaaccggucucuu
chr4_9556	16619.5	83 +/- 11%	-	32590	32575	0	15	yes	-	tgu-miR-103-3p	-	-	agcagcauuguacagggcuauga	agcuucuuuacagugcugccuug	agcuucuuuacagugcugccuuguugcguucaugucaagcagcauuguacagggcuauga
chr1_200	15466.8	83 +/- 11%	-	30328	29939	2	387	yes	-	tgu-let-7i-5p	-	-	ugagguaguaguuugugcugu	cugcgcaagcuacugccuugc	ugagguaguaguuugugcuguuggucggguugugacauugcccgcuguggagauaacugcgcaagcuacugccuugc
chr2_2348	12898.2	83 +/- 11%	-	25292	23877	0	1415	yes	-	tgu-miR-20a-3p	-	-	ccugcauuguacacacugugugu	cacagcgcauacaauguggau	ccugcauuguacacacuguguguguuaacuggaaaugcacagcgcauacaauguggau
chr2_4618	12898.2	83 +/- 11%	-	25292	23877	0	1415	yes	-	tgu-miR-20a-3p	-	-	ccugcauuguacacacugugugu	cacagcgcauacaauguggau	ccugcauuguacacacuguguguguuaacuggaaaugcacagcgcauacaauguggau
chrZ_12609	11525.2	83 +/- 11%	-	22597	22497	0	100	yes	-	tgu-miR-27-3p	-	-	uucacaguggcuaaguucugc	agagcuuagcugauuggugaac	agagcuuagcugauuggugaacagugauuguuucccucuuuguucacaguggcuaaguucugc
chr22_5745	10708.9	83 +/- 11%	-	20996	20324	0	672	yes	-	tgu-miR-2188-5p	-	-	aagguccaaccucacaugucc	auauauguggucagaccuauc	aagguccaaccucacauguccuguauagaauaaggagggauauauguggucagaccuauc
chr22_2985	10708.8	83 +/- 11%	-	20996	20324	0	672	yes	-	tgu-miR-2188-5p	-	-	aagguccaaccucacaugucc	auauauguggucagaccuauc	aagguccaaccucacauguccuguauagaauaaggagggauauauguggucagaccuauc
chr18_4063	9975.6	83 +/- 11%	-	19557	19405	0	152	yes	-	tgu-miR-193a-3p	-	-	aacuggccuacaaagucccag	ugggucuuugcgggcgagauga	ugggucuuugcgggcgagaugagagguucgugucuucaacuggccuacaaagucccag
chr18_2069	9975.6	83 +/- 11%	-	19557	19405	0	152	yes	-	tgu-miR-193a-3p	-	-	aacuggccuacaaagucccag	ugggucuuugcgggcgagauga	ugggucuuugcgggcgagaugagagguucgugucuucaacuggccuacaaagucccag
chr19_2308	9403.5	83 +/- 11%	-	18436	16978	0	1458	yes	-	tgu-miR-144-3p	-	-	uacaguauagaugauguacuc	ggauaucaucauauacuguaag	ggauaucaucauauacuguaaguucacuaugagacacuacaguauagaugauguacuc
chr19_4492	9403.5	83 +/- 11%	-	18436	16978	0	1458	yes	-	tgu-miR-144-3p	-	-	uacaguauagaugauguacuc	ggauaucaucauauacuguaag	ggauaucaucauauacuguaaguucacuaugagacacuacaguauagaugauguacuc
chr6_10734	9166	83 +/- 11%	-	17971	17962	0	9	yes	-	tgu-miR-103-3p	-	-	agcagcauuguacagggcuauc	agcuucuuuacaguguugccu	agcuucuuuacaguguugccuuguggcauggaguucaagcagcauuguacagggcuauc
chr1_1597	7407.1	83 +/- 11%	-	14520	13780	0	740	yes	-	tgu-miR-20a-5p	-	-	caaagugcuuacagugcagguag	acugcagugaaggcacuuguagc	caaagugcuuacagugcagguagugauauauagaaccuacugcagugaaggcacuuguagc
chr30_8049	7214.4	83 +/- 11%	-	14141	13977	0	164	yes	-	tgu-miR-27-3p	-	-	uucacaguggcuaaguuccgc	agggcuuggcgcagcugugaaca	agggcuuggcgcagcugugaacagagcccgucguguucacaguggcuaaguuccgc
chr1_699	5780.8	83 +/- 11%	-	11331	11048	0	283	yes	-	tgu-miR-221-3p	-	-	agcuacaucuggcuacugggucuc	cgcucaguagucaguguagauuc	cgcucaguagucaguguagauucugucuuuacaaucagcagcuacaucuggcuacugggucuc
chr6_10464	5489.8	83 +/- 11%	-	10759	10757	0	2	yes	-	tgu-miR-146a-5p	-	-	ugagaacugaauuccauaggcg	cccuauggauucaguucugcag	ugagaacugaauuccauaggcguuaaagcauccaaaaaugcccuauggauucaguucugcag
chr1_701	5123.1	83 +/- 11%	-	10040	9085	0	955	yes	-	tgu-miR-221-3p	-	-	agcuacauugucugcuggguuuc	accuggcauacaauguagauuuc	accuggcauacaauguagauuucuguguuuguuaagcaacagcuacauugucugcuggguuuc
chrZ_12611	4932.4	83 +/- 11%	-	9675	9657	0	18	no	-	tgu-miR-24-3p	-	-	uggcucaguucagcaggaacag	gugccuacugagcugauaucag	gugccuacugagcugauaucaguucugauuuuacauacuggcucaguucagcaggaacag
chr2_2825	4808.7	83 +/- 11%	-	9424	9405	0	19	yes	-	tgu-miR-30b-5p	-	-	uguaaacauccuacacucagc	cugggggguggauguuuacuuc	uguaaacauccuacacucagcuauaacaagugguagggcugggggguggauguuuacuuc
chr2_5399	4808.7	83 +/- 11%	-	9424	9405	0	19	yes	-	tgu-miR-30b-5p	-	-	uguaaacauccuacacucagc	cugggggguggauguuuacuuc	uguaaacauccuacacucagcuauaacaagugguagggcugggggguggauguuuacuuc
chr33_8431	4767	83 +/- 11%	-	9341	9264	0	77	yes	-	tgu-miR-148a-3p	-	-	ucagugcaucacagaacuugg	gagguucuguccuacacuccggc	gagguucuguccuacacuccggcuguggcuaugggcagucagugcaucacagaacuugg
chr4_9121	4266.6	83 +/- 11%	-	8360	8355	2	3	yes	-	tgu-miR-15a-5p	-	-	uagcagcacguaaauacuggag	uccaguauugcauugcugcuuu	uagcagcacguaaauacuggagugggggaucgccuguugcucuccaguauugcauugcugcuuu
chr30_8047	4253.4	83 +/- 11%	-	8333	8320	0	13	yes	-	tgu-miR-23-3p	-	-	aucacauugccagggauuucca	gggguuccuggcgaugcgauu	gggguuccuggcgaugcgauuuuuuuacccgcugacccaaaaucacauugccagggauuucca
chr1_1185	3820.2	83 +/- 11%	-	7484	7005	5	474	yes	-	tgu-miR-33-5p	-	-	gugcauuguaguugcauugca	caauguuccugcagugcagua	gugcauuguaguugcauugcaugugcuggcaguaacugugcaauguuccugcagugcagua
chr8_11207	3353.7	83 +/- 11%	-	6568	5287	0	1281	yes	-	tgu-miR-214-3p	-	-	acagcaggcacagacaggcag	ugccugucuacacuugcugugc	ugccugucuacacuugcugugcagaacauccucucaccuguacagcaggcacagacaggcag
chr21_2952	3075.6	83 +/- 11%	-	6024	5926	0	98	yes	-	tgu-miR-200a-3p	-	-	uaacacugucugguaacgaugu	caucuuacuagacagugc	caucuuacuagacagugcuggauuucuuggaucuauucuaacacugucugguaacgaugu
chr21_5630	3075.6	83 +/- 11%	-	6024	5926	0	98	yes	-	tgu-miR-200a-3p	-	-	uaacacugucugguaacgaugu	caucuuacuagacagugc	caucuuacuagacagugcuggauuucuuggaucuauucuaacacugucugguaacgaugu
chr26_3218	2816.5	83 +/- 11%	-	5517	5435	0	82	yes	-	tgu-miR-29a-3p	-	-	uagcaccauuugaaaucagugu	cugguuucacaugguggcuuaga	cugguuucacaugguggcuuagauuuucccacuuuguaucuagcaccauuugaaaucagugu
chr26_6330	2816.5	83 +/- 11%	-	5517	5435	0	82	yes	-	tgu-miR-29a-3p	-	-	uagcaccauuugaaaucagugu	cugguuucacaugguggcuuaga	cugguuucacaugguggcuuagauuuucccacuuuguaucuagcaccauuugaaaucagugu
chr1_61	2783.6	83 +/- 11%	-	5452	5434	0	18	yes	-	tgu-miR-29a-3p	-	-	uagcaccauuugaaaucagugu	cugguuucauauggugguuuaga	cugguuucauauggugguuuagauuuaacuauucauugucuagcaccauuugaaaucagugu
chr21_2950	2515.5	83 +/- 11%	-	4926	4903	0	23	yes	-	tgu-miR-200b-3p	-	-	uaauacugucugguaaugccg	gucuuaccaggcaaaguuaga	gucuuaccaggcaaaguuagaucuagcuauuucugucuaauacugucugguaaugccg
chr21_5628	2515.5	83 +/- 11%	-	4926	4903	0	23	yes	-	tgu-miR-200b-3p	-	-	uaauacugucugguaaugccg	gucuuaccaggcaaaguuaga	gucuuaccaggcaaaguuagaucuagcuauuucugucuaauacugucugguaaugccg
chr21_2954	2340.7	83 +/- 11%	-	4583	4449	0	134	yes	-	tgu-miR-200b-3p	-	-	uaauacugccugguaaugauga	caucuuacugggcagcau	caucuuacugggcagcauuggauguucucuguuuuucuaauacugccugguaaugauga
chr21_5632	2340.7	83 +/- 11%	-	4583	4449	0	134	yes	-	tgu-miR-200b-3p	-	-	uaauacugccugguaaugauga	caucuuacugggcagcau	caucuuacugggcagcauuggauguucucuguuuuucuaauacugccugguaaugauga
chr18_2109	2193.7	83 +/- 11%	-	4294	4293	0	1	yes	-	tgu-miR-338-3p	-	-	uccagcaucagugauuuugu	caauauccuggugcugag	caauauccuggugcugagugaguugcacacagagacuccagcaucagugauuuugu
chr18_4149	2193.7	83 +/- 11%	-	4294	4293	0	1	yes	-	tgu-miR-338-3p	-	-	uccagcaucagugauuuugu	caauauccuggugcugag	caauauccuggugcugagugaguugcacacagagacuccagcaucagugauuuugu
chr21_2962	1949.1	83 +/- 11%	-	3826	3822	0	4	no	-	tgu-miR-34b	-	-	uggcagugucuuagcugguug	ccagcugugaguguuucu	ccagcugugaguguuucuuuggcagugucuuagcugguug
chr21_5662	1949.1	83 +/- 11%	-	3826	3822	0	4	no	-	tgu-miR-34b	-	-	uggcagugucuuagcugguug	ccagcugugaguguuucu	ccagcugugaguguuucuuuggcagugucuuagcugguug
chr18_4065	1605.1	83 +/- 11%	-	3140	3115	0	25	yes	-	tgu-miR-365-3p	-	-	uaaugccccuaaaaauccuua	agggacuuucaggggcagcug	agggacuuucaggggcagcuguguuuuacuaacccagucauaaugccccuaaaaauccuua
chr18_2071	1605.1	83 +/- 11%	-	3140	3115	0	25	yes	-	tgu-miR-365-3p	-	-	uaaugccccuaaaaauccuua	agggacuuucaggggcagcug	agggacuuucaggggcagcuguguuuuacuaacccagucauaaugccccuaaaaauccuua
chr20_2863	1526.1	83 +/- 11%	-	2985	2964	0	21	yes	-	tgu-miR-133-3p	-	-	uuugguccccuucaaccagcug	agcugguaaaauggaaccaaa	agcugguaaaauggaaccaaaucaacuguucaauggauuugguccccuucaaccagcug
chr20_5475	1526.1	83 +/- 11%	-	2985	2964	0	21	yes	-	tgu-miR-133-3p	-	-	uuugguccccuucaaccagcug	agcugguaaaauggaaccaaa	agcugguaaaauggaaccaaaucaacuguucaauggauuugguccccuucaaccagcug
chr2_2754	1525.9	83 +/- 11%	-	2985	2964	0	21	yes	-	tgu-miR-133-3p	-	-	uuugguccccuucaaccagcug	agcugguaaaauggaaccaaa	agcugguaaaauggaaccaaaucaccucuucaauggauuugguccccuucaaccagcug
chr2_5246	1525.9	83 +/- 11%	-	2985	2964	0	21	yes	-	tgu-miR-133-3p	-	-	uuugguccccuucaaccagcug	agcugguaaaauggaaccaaa	agcugguaaaauggaaccaaaucaccucuucaauggauuugguccccuucaaccagcug
chr2_2723	1276	83 +/- 11%	-	2494	2235	0	259	yes	-	tgu-miR-363-3p	-	-	uauugcacauuacuaaguugc	caauuuagugugugcgauac	uauugcacauuacuaaguugcauguugucacggccucagugcaauuuagugugugcgauac
chr2_5209	1276	83 +/- 11%	-	2494	2235	0	259	yes	-	tgu-miR-363-3p	-	-	uauugcacauuacuaaguugc	caauuuagugugugcgauac	uauugcacauuacuaaguugcauguugucacggccucagugcaauuuagugugugcgauac
chr28_6680	1055.7	83 +/- 11%	-	2063	1768	0	295	yes	-	tgu-miR-9-5p	-	-	ucuuugguuaucuagcuguauga	uaaagcuagagaaccgaaugua	ucuuugguuaucuagcuguaugaguguaugugauaucauaaagcuagagaaccgaaugua
chr25_3161	1027.7	83 +/- 11%	-	2007	1766	0	241	yes	-	tgu-miR-9-5p	-	-	ucuuugguuaucuagcuguauga	auaaagcuagauaaccgaaag	ucuuugguuaucuagcuguaugaguggugucgauucuucauaaagcuagauaaccgaaag
chr25_6141	1027.7	83 +/- 11%	-	2007	1766	0	241	yes	-	tgu-miR-9-5p	-	-	ucuuugguuaucuagcuguauga	auaaagcuagauaaccgaaag	ucuuugguuaucuagcuguaugaguggugucgauucuucauaaagcuagauaaccgaaag
chrZ_12672	1027.6	83 +/- 11%	-	2007	1766	0	241	yes	-	tgu-miR-9-5p	-	-	ucuuugguuaucuagcuguauga	auaaagcuagauaaccgaaag	ucuuugguuaucuagcuguaugaguguuuuggucuucauaaagcuagauaaccgaaag
chr1_634	1010.4	83 +/- 11%	-	1973	1968	0	5	yes	-	tgu-let-7i-5p	-	-	ugagguaguagguuguauggu	cuguacaaccuucuagcuuucc	ugagguaguagguuguaugguuuagaguuacacccugggaguuaacuguacaaccuucuagcuuucc
chr19_4312	965.4	83 +/- 11%	-	1891	1890	0	1	yes	-	-	-	-	aacaguaagaguugaugugcgg	ugcaugugagcuccuacugccg	aacaguaagaguugaugugcggcgaacgcagccugcaugugagcuccuacugccg
chr19_2212	965.4	83 +/- 11%	-	1891	1890	0	1	yes	-	-	-	-	aacaguaagaguugaugugcgg	ugcaugugagcuccuacugccg	aacaguaagaguugaugugcggcgaacgcagccugcaugugagcuccuacugccg
chr4_9115	953.8	83 +/- 11%	-	1862	1847	0	15	yes	-	tgu-miR-20a-5p	-	-	caaagugcucauagugcagguag	uacuguaaugugggcacuuac	caaagugcucauagugcagguagcuuggcauuggaccuacuguaaugugggcacuuac
chr3_7208	851.4	83 +/- 11%	-	1660	1425	0	235	yes	-	tgu-miR-1451-5p	-	-	ucgcacaggagcaaguuaccg	cguaacucgcugcugugagagg	ucgcacaggagcaaguuaccgcguucagcucgccugccguaacucgcugcugugagagg
chrZ_13045	763.3	83 +/- 11%	-	1502	1490	0	12	no	-	-	-	-	aaaggacggaggcggcccgcgc	cggggucgucgccgucccuucc	aaaggacggaggcggcccgcgcggggucguucagucggggucgucgccgucccuucc
chr4_9119	690.3	83 +/- 11%	-	1353	1182	0	171	no	-	tgu-miR-20a-5p	-	-	aaaagugcuuacagugcagguag	acugcaguauaagcacuucuggc	aaaagugcuuacagugcagguagagcucagcaccuacugcaguauaagcacuucuggc
chr19_4457	634.3	83 +/- 11%	-	1241	721	0	520	yes	-	-	-	-	accguggcuuuagauuguuac	uaacagucuacagccauggucg	accguggcuuuagauuguuacugugcugcuggggggguaacagucuacagccauggucg
chr19_2283	634.3	83 +/- 11%	-	1241	721	0	520	yes	-	-	-	-	accguggcuuuagauuguuac	uaacagucuacagccauggucg	accguggcuuuagauuguuacugugcugcuggggggguaacagucuacagccauggucg
chr7_10929	571.6	83 +/- 11%	-	1112	1095	0	17	yes	-	tgu-miR-153-3p	-	-	uugcauagucacaaaagugaucg	ucauuuuugugauuugcagc	ucauuuuugugauuugcagcuaguaaucuggcuccaguugcauagucacaaaagugaucg
chr1_1595	410.4	83 +/- 11%	-	806	738	0	68	no	-	tgu-miR-18a	-	-	uaaggugcaucuagugcagauag	acugcccuaagugcuccuuc	uaaggugcaucuagugcagauagugaaguagauuagcaucuacugcccuaagugcuccuuc
chr1_680	410.2	83 +/- 11%	-	803	618	0	185	yes	-	-	-	-	cagccauucugcgauucuguga	agagaaucauagaaugguc	cagccauucugcgauucugugauaacuuuuagaaucagagaaucauagaaugguc
chr1_802	372.4	83 +/- 11%	-	728	489	0	239	yes	-	-	-	-	uuagugcgcgguaagcuagggug	cgcuagcugcucugcacugac	uuagugcgcgguaagcuagggugugagcugacagcacgcuagcugcucugcacugac
chr2_4992	279.8	83 +/- 11%	-	540	530	0	10	yes	-	tgu-miR-153-3p	-	-	uugcauagucacaaaagugauc	gucauuuuugugauguugcagc	gucauuuuugugauguugcagcuaguaauaugagcccaguugcauagucacaaaagugauc
chr2_2604	279.7	83 +/- 11%	-	540	530	0	10	yes	-	tgu-miR-153-3p	-	-	uugcauagucacaaaagugauc	gucauuuuugugauguugcagc	gucauuuuugugauguugcagcuaguaauaugagcccaguugcauagucacaaaagugauc
chr1_230	257.6	83 +/- 11%	-	497	484	0	13	yes	-	tgu-miR-135a-5p	-	-	uauggcuuuuuauuccuauguga	uguagggauggaagccaugaaa	uauggcuuuuuauuccuaugugauaguaauaaagucucauguagggauggaagccaugaaa
chr26_6279	255.6	83 +/- 11%	-	492	482	0	10	yes	-	tgu-miR-135a-5p	-	-	uauggcuuuuuauuccuauguga	auguagggcgaaaagccaugggc	uauggcuuuuuauuccuaugugauugcuuuuccuaacucauguagggcgaaaagccaugggc
chr26_3203	255.6	83 +/- 11%	-	492	482	0	10	yes	-	tgu-miR-135a-5p	-	-	uauggcuuuuuauuccuauguga	auguagggcgaaaagccaugggc	uauggcuuuuuauuccuaugugauugcuuuuccuaacucauguagggcgaaaagccaugggc
chr4_8611	233.8	83 +/- 11%	-	450	431	0	19	yes	-	tgu-miR-221-3p	-	-	agcuacaucugauuacugggucac	ugcucaguagucaguguaggauc	ugcucaguagucaguguaggaucuguccgacagucucacuaacagcuacaucugauuacugggucac
chr2_5069	219.9	83 +/- 11%	-	422	421	0	1	yes	-	tgu-miR-2958	-	-	agcugguguugugaaucaggccg	gcuacuucacaacaccaggg	agcugguguugugaaucaggccgucaccagucggagaacggcuacuucacaacaccaggg
chr2_2643	219.9	83 +/- 11%	-	422	421	0	1	yes	-	tgu-miR-2958	-	-	agcugguguugugaaucaggccg	gcuacuucacaacaccaggg	agcugguguugugaaucaggccgucaccagucggagaacggcuacuucacaacaccaggg
chrZ_13017	181.5	83 +/- 11%	-	348	228	0	120	yes	-	tgu-miR-7-5p	-	-	uggaagacuagugauuuuguugu	caacaaaucacagucugccaua	uggaagacuagugauuuuguuguuuuuagauaauuaaauugacaacaaaucacagucugccaua
chr1_1576	173	83 +/- 11%	-	337	327	0	10	yes	-	-	-	-	agcaccuucggaacuguccuca	agggcaauuccugauaggugc	agggcaauuccugauaggugcugagcaccaucuagcugcaaagucagcaccuucggaacuguccuca
chr21_5636	145.9	83 +/- 11%	-	300	276	20	4	no	-	-	-	-	caguaagagguaccugcaaacag	ugggcguaaacacuucucugcc	ugggcguaaacacuucucugccugucuguucuucaguguuuggagcugugacuugcaaugcaguaagagguaccugcaaacag
chr21_2956	145.9	83 +/- 11%	-	300	276	20	4	no	-	-	-	-	caguaagagguaccugcaaacag	ugggcguaaacacuucucugcc	ugggcguaaacacuucucugccugucuguucuucaguguuuggagcugugacuugcaaugcaguaagagguaccugcaaacag
chr8_11474	136.6	83 +/- 11%	-	265	242	0	23	yes	-	-	-	-	cacagcaaguguagacaggcag	ccugucugugccugcuguacag	ccugucugugccugcuguacaggugagaggauguucugcacagcaaguguagacaggcag
chrZ_13099	135.4	83 +/- 11%	-	257	182	0	75	yes	-	tgu-miR-2131	-	-	augcagaagugcacggaaacagc	cuguuacuguucuucugaugg	augcagaagugcacggaaacagcuguuugcuaucgaaaaguuggcuguuacuguucuucugaugg
chrZ_12590	120.6	83 +/- 11%	-	236	233	0	3	yes	-	-	-	-	uccuuaacucaugccgcugugc	caauuguaugaguugaguaca	uccuuaacucaugccgcugugccuuuauauuuuauuucacaauuguaugaguugaguaca
chr4_9117	114.1	83 +/- 11%	-	216	214	0	2	yes	-	tgu-miR-18a	-	-	uaaggugcaucuagugcag	ugcccuaaaugcuccuucuggc	uaaggugcaucuagugcaguuagugacguagcguagaaucuacugcccuaaaugcuccuucuggc
chr9_12022	112.7	83 +/- 11%	-	212	209	0	3	yes	-	tgu-miR-551-3p	-	-	gcgacccauacuugguuucag	gaaaucaaggguggguaagacc	gaaaucaaggguggguaagaccuuguaggauaacuggcaggcgacccauacuugguuucag
chr2_4809	104	83 +/- 11%	-	195	182	0	13	yes	-	tgu-miR-187-3p	-	-	ucgugucuuguguugcagccag	gcuacaacacaggacaugggag	gcuacaacacaggacaugggagcuuuucugaacccucgugucuuguguugcagccag
chr2_2489	104	83 +/- 11%	-	195	182	0	13	yes	-	tgu-miR-187-3p	-	-	ucgugucuuguguugcagccag	gcuacaacacaggacaugggag	gcuacaacacaggacaugggagcuuuucugaacccucgugucuuguguugcagccag
chr4_9566	92.5	83 +/- 11%	-	180	179	0	1	yes	-	-	-	-	aaguaugaggaaauggagauc	agcucugcuuccucauacauac	agcucugcuuccucauacauacucaucuuuucuauggauaaguaugaggaaauggagauc
chr4_8972	83.8	83 +/- 11%	-	156	152	0	4	yes	-	tgu-miR-383-5p	-	-	agaucagaaggugauuguggc	ccacagcacugccuggucagaa	agaucagaaggugauuguggcuuuggguaaauauugagcagccacagcacugccuggucagaa
chr2_2533	68.8	83 +/- 11%	-	126	125	0	1	yes	-	tgu-miR-124-3p	-	-	uaaggcacgcggugaaugcca	cguguucacagcggaccuuga	cguguucacagcggaccuugauuuaaugucauacaauuaaggcacgcggugaaugcca
chr20_5479	68.8	83 +/- 11%	-	126	125	0	1	yes	-	tgu-miR-124-3p	-	-	uaaggcacgcggugaaugcca	cguguucacagcggaccuuga	cguguucacagcggaccuugauuuaauguccauacaauuaaggcacgcggugaaugcca
chr2_4881	68.8	83 +/- 11%	-	126	125	0	1	yes	-	tgu-miR-124-3p	-	-	uaaggcacgcggugaaugcca	cguguucacagcggaccuuga	cguguucacagcggaccuugauuuaaugucauacaauuaaggcacgcggugaaugcca
chr20_2867	68.8	83 +/- 11%	-	126	125	0	1	yes	-	tgu-miR-124-3p	-	-	uaaggcacgcggugaaugcca	cguguucacagcggaccuuga	cguguucacagcggaccuugauuuaauguccauacaauuaaggcacgcggugaaugcca
chr3_7890	68.2	83 +/- 11%	-	126	125	0	1	yes	-	tgu-miR-124-3p	-	-	uaaggcacgcggugaaugcca	cguguucacagcggaccuuga	cguguucacagcggaccuugauuuaaauguccauacaauuaaggcacgcggugaaugcca
chr1_1031	63.1	83 +/- 11%	-	115	113	0	2	yes	-	tgu-miR-183	-	-	uauggcacugguagaauucac	ugaauuaccauagggccauaa	uauggcacugguagaauucacugugcaaccccgcggucagugaauuaccauagggccauaa
chr30_8032	62	83 +/- 11%	-	120	94	0	26	yes	-	-	-	-	gcccccaucgauuugcucuac	aagggcaaacccgaugggcacc	gcccccaucgauuugcucuacgaacugaugaagcagaagggcaaacccgaugggcacc
chr5_9717	56	83 +/- 11%	-	107	85	0	22	yes	-	-	-	-	uggcauccagaacagcgguac	uaccgcuguccugggugcc	uaccgcuguccugggugccuggcagagcucgugcacuggcauccagaacagcgguac
chr3_7155	45.4	83 +/- 11%	-	88	57	0	31	yes	-	-	-	-	cacucuggguguuucucuugcag	uuagagagacacucauagaga	uuagagagacacucauagagagucuuuucacaguaacucacucuggguguuucucuugcag
chr3_7095	43	83 +/- 11%	-	97	96	0	1	no	-	-	-	-	aucuugucugcuggggauggacaac	aaguccacugcauaugagagguga	aaguccacugcauaugagaggugaaaguaacaguauuucaucuugucugcuggggauggacaac
chr3_7203	34.6	83 +/- 11%	-	59	37	0	22	yes	-	tgu-miR-1677-3p	-	-	uugacuucaguaggagcaggau	uccugcaccgcugaagucaa	uccugcaccgcugaagucaauggaaguuuugucauugacuucaguaggagcaggau
chrZ_13020	33.7	83 +/- 11%	-	76	31	0	45	no	-	-	-	-	aucugugggauuaugacuga	gucagaauccccccuaaac	aucugugggauuaugacugaaugccuccaagucagaauccccccuaaac
chr2_2802	32.6	83 +/- 11%	-	56	47	0	9	yes	-	tgu-miR-1467-3p	-	-	uucacaccagaguaacugggauc	ucucagcuacaucgguguaaauc	ucucagcuacaucgguguaaauccagggcaauucuacugagguucacaccagaguaacugggauc
chr2_5380	32.6	83 +/- 11%	-	56	47	0	9	yes	-	tgu-miR-1467-3p	-	-	uucacaccagaguaacugggauc	ucucagcuacaucgguguaaauc	ucucagcuacaucgguguaaauccagggcaauucuacugagguucacaccagaguaacugggauc
chr1_1655	31.9	83 +/- 11%	-	61	48	0	13	yes	-	-	-	-	agaagagcauuuaaaugugugc	acacauuucagugcuucccuga	agaagagcauuuaaaugugugcuuacaaacgaaacacacauuucagugcuucccuga
chr28_6563	29.6	83 +/- 11%	-	63	62	0	1	no	-	-	-	-	cugaccgcucucucccgcag	gcgggggcgggccgggcc	gcgggggcgggccgggccgcggcgcagcgcugaccgcucucucccgcag
chr5_9788	28.6	83 +/- 11%	-	47	27	0	20	yes	-	tgu-miR-129-5p	-	-	cuuuuugcggucugggcuugc	aagcccuuaccccaaaaagca	cuuuuugcggucugggcuugcuguacauaacuaccuacccgggaagcccuuaccccaaaaagca
chr1_1520	28.6	83 +/- 11%	-	48	44	0	4	yes	-	tgu-miR-1805-3p	-	-	uguauuggaacacuacagcucc	aguuguagucuuucaaacaga	aguuguagucuuucaaacagagcuuugcaaggacauaccuguauuggaacacuacagcucc
chr5_9887	27.9	83 +/- 11%	-	53	52	0	1	yes	-	-	-	-	ugaaauguuuaggaccacuug	agugguucuuaacaguucaacag	agugguucuuaacaguucaacaguucucuaucauaauugugaaauguuuaggaccacuug
chr17_3713	25.5	83 +/- 11%	-	48	29	0	19	yes	-	-	-	-	agaauugugucuggacaucug	ugauuguccaaacgcaauucu	ugauuguccaaacgcaauucuugugcgcuggagccguacgaaccaagaauugugucuggacaucug
chr17_1976	25.5	83 +/- 11%	-	48	29	0	19	yes	-	-	-	-	agaauugugucuggacaucug	ugauuguccaaacgcaauucu	ugauuguccaaacgcaauucuugugcgcuggagccguacgaaccaagaauugugucuggacaucug
chr2_5173	24.8	83 +/- 11%	-	47	39	0	8	yes	-	-	-	-	ugcacuugaauggaguucuggg	ccugaaucccuucaaguggac	ugcacuugaauggaguucuggguguucucauggauccugaaucccuucaaguggac
chr2_2703	24.8	83 +/- 11%	-	47	39	0	8	yes	-	-	-	-	ugcacuugaauggaguucuggg	ccugaaucccuucaaguggac	ugcacuugaauggaguucuggguguucucauggauccugaaucccuucaaguggac
chr19_4379	23.8	83 +/- 11%	-	45	44	0	1	yes	-	-	-	-	ugugcgguugcagaagaagaag	uuccucuucucuuccgcccca	ugugcgguugcagaagaagaagaccggcgcuucacggcuuucuuccucuucucuuccgcccca
chr19_4371	23.8	83 +/- 11%	-	45	44	0	1	yes	-	-	-	-	ugugcgguugcagaagaagaag	uuccucuucucuuccgcccca	ugugcgguugcagaagaagaagaccggcgcuucacggcuuucuuccucuucucuuccgcccca
chr19_2241	23.8	83 +/- 11%	-	45	44	0	1	yes	-	-	-	-	ugugcgguugcagaagaagaag	uuccucuucucuuccgcccca	ugugcgguugcagaagaagaagaccggcgcuucacggcuuucuuccucuucucuuccgcccca
chr19_2188	23.8	83 +/- 11%	-	45	44	0	1	yes	-	-	-	-	ugugcgguugcagaagaagaag	uuccucuucucuuccgcccca	ugugcgguugcagaagaagaagaccggcgcuucacggcuuucuuccucuucucuuccgcccca
chr19_4262	23.8	83 +/- 11%	-	45	44	0	1	yes	-	-	-	-	ugugcgguugcagaagaagaag	uuccucuucucuuccgcccca	ugugcgguugcagaagaagaagaccggcgcuucacggcuuucuuccucuucucuuccgcccca
chr19_2243	23.8	83 +/- 11%	-	45	44	0	1	yes	-	-	-	-	ugugcgguugcagaagaagaag	uuccucuucucuuccgcccca	ugugcgguugcagaagaagaagaccggcgcuucacggcuuucuuccucuucucuuccgcccca
chr19_2245	23.8	83 +/- 11%	-	45	44	0	1	yes	-	-	-	-	ugugcgguugcagaagaagaag	uuccucuucucuuccgcccca	ugugcgguugcagaagaagaagaccggcgcuucacggcuuucuuccucuucucuuccgcccca
chr24_3102	23.6	83 +/- 11%	-	37	36	0	1	yes	-	tgu-miR-34b	-	-	aggcaguguaguuagcugauugc	aucacuaaccacacagccagg	aggcaguguaguuagcugauugccaccaggaccaaucacuaaccacacagccagg
chr24_5962	23.6	83 +/- 11%	-	37	36	0	1	yes	-	tgu-miR-34b	-	-	aggcaguguaguuagcugauugc	aucacuaaccacacagccagg	aggcaguguaguuagcugauugccaccaggaccaaucacuaaccacacagccagg
chr4_8876	22.9	83 +/- 11%	-	43	24	0	19	yes	-	-	-	-	agcugcucuguuccugcauccc	augaaggacgagggcagaccgcg	agcugcucuguuccugcaucccacaggaagcaguuugggaugaaggacgagggcagaccgcg
chr19_4381	20	83 +/- 11%	-	45	44	0	1	no	-	-	-	-	ugugcgguugcagaagaagaag	uuccucuucucuuccgcccca	ugugcgguugcagaagaagaagaccggcgcuucacggcuuucuuccucuucucuuccgcccca
chr1_823	19.8	83 +/- 11%	-	29	13	0	16	yes	-	tgu-miR-2984-5p	-	-	ugccugcugugagugaaauug	auuucacucucagcaggcuccg	ugccugcugugagugaaauugucugagcuggugccgcacuuuaucaauuucacucucagcaggcuccg
chr1_49	18.5	83 +/- 11%	-	35	23	0	12	yes	-	-	-	-	uugcuuuuguuggccucugcug	gcuaagacugauaaaagcaagc	gcuaagacugauaaaagcaagcaaauuauuuacaguuugcuuuuguuggccucugcug
chr1_1306	18.2	83 +/- 11%	-	27	19	0	8	yes	-	tgu-miR-490-3p	-	-	caaccuggaggacuccaugcug	ccauggaucuccagguggg	ccauggaucuccaggugggucaagauuauagagauacaccaaccuggaggacuccaugcug
chr8_11302	16	83 +/- 11%	-	29	23	0	6	yes	-	-	-	-	ucagcuggucuuggguaaaugc	uuuacccauggugggcugauac	ucagcuggucuuggguaaaugcuauuguuccugcaguauuuacccauggugggcugauac
chr22_5699	14.2	83 +/- 11%	-	25	17	0	8	yes	-	-	-	-	ugcgcacacacgcggccugaag	cugggacgcgcgugcgcgcacg	cugggacgcgcgugcgcgcacguuuguacgcucaggugugcgcacacacgcggccugaag
chr22_2970	14.1	83 +/- 11%	-	25	17	0	8	yes	-	-	-	-	ugcgcacacacgcggccugaag	cugggacgcgcgugcgcgcacg	cugggacgcgcgugcgcgcacguuuguacgcucaggugugcgcacacacgcggccugaag
chr19_2255	13.8	83 +/- 11%	-	25	14	0	11	yes	-	-	-	-	aguaaggcuccuucugaccucc	aguguuaggugcagccuugcugc	aguaaggcuccuucugaccuccuugcacucucugggaccuggaguguuaggugcagccuugcugc
chr19_4399	13.8	83 +/- 11%	-	25	14	0	11	yes	-	-	-	-	aguaaggcuccuucugaccucc	aguguuaggugcagccuugcugc	aguaaggcuccuucugaccuccuugcacucucugggaccuggaguguuaggugcagccuugcugc
chr24_5960	13	83 +/- 11%	-	18	17	0	1	yes	-	tgu-miR-34b	-	-	aggcaguguaguuagcugauug	aaucacuaaauucacugccauc	aggcaguguaguuagcugauuguacccagcgccccacaaucacuaaauucacugccauc
chr24_3100	13	83 +/- 11%	-	18	17	0	1	yes	-	tgu-miR-34b	-	-	aggcaguguaguuagcugauug	aaucacuaaauucacugccauc	aggcaguguaguuagcugauuguacccagcgccccacaaucacuaaauucacugccauc
chr5_9579	9.9	82 +/- 11%	-	17	16	0	1	yes	-	-	-	-	uuugggugccagccccguugcg	ggacggggcugggauccaggac	ggacggggcugggauccaggaccugcugcgggcauuggaaguguuuugggugccagccccguugcg
chr18_2125	9.8	82 +/- 11%	-	27	16	0	11	no	-	-	-	-	uggucauguaugauacugcaca	augcaguaacaggugugagc	augcaguaacaggugugagcauccaugcagcauucugauggucauguaugauacugcaca
chr22_5716	9.6	82 +/- 11%	-	23	16	0	7	no	-	-	-	-	cccggggugggcacgcuguac	cccagcacgccuaccccgggcc	cccggggugggcacgcuguacggcacgcagcggcugccccagcacgccuaccccgggcc
chr22_2976	9.6	82 +/- 11%	-	23	16	0	7	no	-	-	-	-	cccggggugggcacgcuguac	cccagcacgccuaccccgggcc	cccggggugggcacgcuguacggcacgcagcggcugccccagcacgccuaccccgggcc
chr2_2831	8.6	83 +/- 10%	-	14	13	0	1	yes	-	-	-	-	caucuuggaguauaagguacc	uaccugcaccccaagaugac	caucuuggaguauaagguaccugauagagggugcagcagguaccugcaccccaagaugac
chr2_5409	8.6	83 +/- 10%	-	14	13	0	1	yes	-	-	-	-	caucuuggaguauaagguacc	uaccugcaccccaagaugac	caucuuggaguauaagguaccugauagagggugcagcagguaccugcaccccaagaugac
chr2_2455	7.7	85 +/- 9%	-	12	10	0	2	yes	-	-	-	-	cgcgccgauugucuccuccgggca	cccggaggagcccggcgcugc	cccggaggagcccggcgcugccuuucuacgcggccgccgcgccgauugucuccuccgggca
chr2_4771	7.7	85 +/- 9%	-	12	10	0	2	yes	-	-	-	-	cgcgccgauugucuccuccgggca	cccggaggagcccggcgcugc	cccggaggagcccggcgcugccuuucuacgcggccgccgcgccgauugucuccuccgggca
chr23_2993	7.2	85 +/- 9%	-	12	11	0	1	yes	-	-	-	-	ugcgcuuucucaucccggcag	gguugggaugggauggugcugc	gguugggaugggauggugcugcacugcccagcucugauggcgcugcgcuuucucaucccggcag
chr23_5759	7.2	85 +/- 9%	-	12	11	0	1	yes	-	-	-	-	ugcgcuuucucaucccggcag	gguugggaugggauggugcugc	gguugggaugggauggugcugcacugcccagcucugauggcgcugcgcuuucucaucccggcag
chr2_5236	6.9	85 +/- 9%	-	13	11	0	2	yes	-	-	-	-	auuauuuuacagacagaucgc	ugaucugccugcaaaguacccc	ugaucugccugcaaaguaccccgggaaacaaaaacaggauuauuuuacagacagaucgc
chr2_2748	6.9	85 +/- 9%	-	13	11	0	2	yes	-	-	-	-	auuauuuuacagacagaucgc	ugaucugccugcaaaguacccc	ugaucugccugcaaaguaccccgggaaacaaaaacaggauuauuuuacagacagaucgc
chr6_10465	6.8	85 +/- 9%	-	13	12	0	1	yes	-	-	-	-	cauuugaaaauccacccagua	cuggguuggguuuucauugacu	cuggguuggguuuucauugacuucagagggagcacacugaaugcauuugaaaauccacccagua
chr33_8483	5.8	85 +/- 8%	-	1481040	1481040	0	0	yes	-	tgu-miR-26-5p	-	-	uucaaguaauccaggauaggc	cuguccuccguuacuuggggu	uucaaguaauccaggauaggcugugccccccccggccuguccuccguuacuuggggu
chr3_7685	5.7	85 +/- 8%	-	9	6	0	3	yes	-	-	-	-	auggcugugagugcggcugagg	ucagccgucuugcagccucc	auggcugugagugcggcugaggugucagagcauccuccucagccgucuugcagccucc
chr23_5789	5.5	85 +/- 8%	-	2808	2808	0	0	yes	-	tgu-miR-133-3p	-	-	uuugguccccuucaaccagcug	gcugguaaaaaggaaccagauc	gcugguaaaaaggaaccagaucaacuacaacuggauuugguccccuucaaccagcug
chr21_2961	5.5	85 +/- 8%	-	4118	3822	1	295	yes	-	tgu-miR-34b	-	-	uggcagugucuuagcugguug	caaucagcaaguauacugccc	uggcagugucuuagcugguuguugugagcaauaguuaaggaagcaaucagcaaguauacugccc
chr18_4060	5.5	85 +/- 8%	-	7	6	0	1	yes	-	-	-	-	ccccgcgccgugcggugccggc	cggcgcugagcucggcguggcggc	ccccgcgccgugcggugccggcggugugugcggugccggcgcugagcucggcguggcggc
chr7_10939	5.5	85 +/- 8%	-	5333	5333	0	0	yes	-	tgu-miR-375	-	-	uuuguucguucggcucgcguua	gcgucgagccccacgugcaagac	gcgucgagccccacgugcaagaccugaccugaacguuuuguucguucggcucgcguua
chr28_6642	5.5	85 +/- 8%	-	280	280	0	0	yes	-	tgu-miR-204	-	-	uucccuuugucauccuaugcc	cugggacggugaagggaggc	uucccuuugucauccuaugccugagcgaugccuggaggcugggacggugaagggaggc
chr18_2064	5.5	85 +/- 8%	-	7	6	0	1	yes	-	-	-	-	ccccgcgccgugcggugccggc	cggcgcugagcucggcguggcggc	ccccgcgccgugcggugccggcggugugugcggugccggcgcugagcucggcguggcggc
chr6_10493	5.5	85 +/- 8%	-	9	7	0	2	yes	-	-	-	-	uuucucugucaguggguaggaggc	uuccuacccauguggagaaaga	uuccuacccauguggagaaagacgcuggucaugucugcuuucucugucaguggguaggaggc
chr21_5661	5.5	85 +/- 8%	-	4118	3822	1	295	yes	-	tgu-miR-34b	-	-	uggcagugucuuagcugguug	caaucagcaaguauacugccc	uggcagugucuuagcugguuguugugagcaauaguuaaggaagcaaucagcaaguauacugccc
chr23_3003	5.5	85 +/- 8%	-	2808	2808	0	0	yes	-	tgu-miR-133-3p	-	-	uuugguccccuucaaccagcug	gcugguaaaaaggaaccagauc	gcugguaaaaaggaaccagaucaacuacaacuggauuugguccccuucaaccagcug
chr18_2115	5.5	85 +/- 8%	-	198	198	0	0	yes	-	tgu-miR-137-3p	-	-	uuauugcuggagaauacgcguag	acggguauucucgggcggauaaca	acggguauucucgggcggauaacacggccgcgcuguuauugcuggagaauacgcguag
chr25_6143	5.4	85 +/- 8%	-	16	15	0	1	yes	-	tgu-miR-190-5p	-	-	ugauauguuugauauuaggu	acuaaauaucaaacauauuc	ugauauguuugauauuagguuguuugauuggaaaccaacuaaauaucaaacauauuc
chr25_3163	5.4	85 +/- 8%	-	16	15	0	1	yes	-	tgu-miR-190-5p	-	-	ugauauguuugauauuaggu	acuaaauaucaaacauauuc	ugauauguuugauauuagguuguuugauuggaaaccaacuaaauaucaaacauauuc
chrZ_13078	5.4	85 +/- 8%	-	24	24	0	0	yes	-	tgu-miR-1756	-	-	uccagugauucacaccagcug	gcugguguaagucagcagagc	gcugguguaagucagcagagcuccacugacauuauuagugcuccagugauucacaccagcug
chr8_11315	5.4	85 +/- 8%	-	41	41	0	0	yes	-	tgu-miR-137-3p	-	-	uuauugcuuaagaauacgcg	gguauucuuggguggauaaua	gguauucuuggguggauaauacggauuacguuguuauugcuuaagaauacgcg
chr4_9563	5.4	85 +/- 8%	-	80155	76587	0	3568	yes	-	tgu-miR-146a-5p	-	-	ugagaacugaauuccauggac	guccaugguauucaguucuc	ugagaacugaauuccauggacugguuucaauuccaugcguucaguccaugguauucaguucuc
chr4_9114	5.4	85 +/- 8%	-	9918	9918	0	0	yes	-	tgu-miR-19b-3p	-	-	ugugcaaauccaugcaaaac	uuugcagguuugcaucccagc	uuugcagguuugcaucccagcuugcuaaaauugcugugcaaauccaugcaaaac
chr2_4739	5.4	85 +/- 8%	-	31981	31981	0	0	yes	-	tgu-miR-128-3p	-	-	ucacagugaaccggucucuu	ggggccguuacacuguaagaga	ggggccguuacacuguaagagagugaguagcaggucucacagugaaccggucucuu
chr2_2421	5.4	85 +/- 8%	-	31981	31981	0	0	yes	-	tgu-miR-128-3p	-	-	ucacagugaaccggucucuu	ggggccguuacacuguaagaga	ggggccguuacacuguaagagagugaguagcaggucucacagugaaccggucucuu
chr8_11608	5.4	85 +/- 8%	-	245003	243074	0	1929	yes	-	tgu-miR-101-3p	-	-	guacaguacugugauaacuga	ucaguuaucacagugcugaugc	ucaguuaucacagugcugaugcugucucuuguaaagguacaguacugugauaacuga
chrZ_13101	5.3	85 +/- 8%	-	34	34	0	0	yes	-	tgu-miR-31	-	-	aggcaagauguuggcauagc	uaugccaacauauugucauc	aggcaagauguuggcauagcuguuaaccuaaaaaccugcuaugccaacauauugucauc
chr26_3182	5.3	85 +/- 8%	-	91	91	0	0	yes	-	tgu-miR-205	-	-	uccuucauuccaccggaguc	uuucaguggagugaagcaca	uccuucauuccaccggagucugucucguaccuaaccagauuucaguggagugaagcaca
chr17_3810	5.3	85 +/- 8%	-	6036	6036	0	0	yes	-	tgu-miR-219b	-	-	cacaagaauugcguuuggacaa	guccagacacaauucuugguuc	guccagacacaauucuugguucguacggcuccagcgcacaagaauugcguuuggacaa
chr17_2036	5.3	85 +/- 8%	-	6036	6036	0	0	yes	-	tgu-miR-219b	-	-	cacaagaauugcguuuggacaa	guccagacacaauucuugguuc	guccagacacaauucuugguucguacggcuccagcgcacaagaauugcguuuggacaa
chr4_8614	5.3	85 +/- 8%	-	121	102	0	19	yes	-	tgu-miR-460b-5p	-	-	uccucauuguacaugcugugugu	acagcgcaugcaauguggac	uccucauuguacaugcuguguguauuugccacguacacagcgcaugcaauguggac
chr17_1962	5.3	85 +/- 8%	-	2935	2118	0	817	yes	-	tgu-miR-455-5p	-	-	uaugugcccuuggacuacaucg	gcaguccaugggcauauacac	uaugugcccuuggacuacaucguggaagccagcaccaugcaguccaugggcauauacac
chr17_3694	5.3	85 +/- 8%	-	2935	2118	0	817	yes	-	tgu-miR-455-5p	-	-	uaugugcccuuggacuacaucg	gcaguccaugggcauauacac	uaugugcccuuggacuacaucguggaagccagcaccaugcaguccaugggcauauacac
chr26_6220	5.3	85 +/- 8%	-	91	91	0	0	yes	-	tgu-miR-205	-	-	uccuucauuccaccggaguc	uuucaguggagugaagcaca	uccuucauuccaccggagucugucucguaccuaaccagauuucaguggagugaagcaca
chr1_632	5.3	85 +/- 8%	-	7995	7691	0	304	yes	-	tgu-miR-100-5p	-	-	aacccguagauccgaucuug	caagcucgcuucuaugggucug	aacccguagauccgaucuuguguugaaaugcacugcacaagcucgcuucuaugggucug
chrZ_12607	5.2	85 +/- 8%	-	2823	2823	0	0	yes	-	tgu-miR-23-3p	-	-	aucacauugccagggauuaccac	ggguuccuggcaugaugauuu	ggguuccuggcaugaugauuugugaguuaagauuaaaaucacauugccagggauuaccac
chrZ_12999	5.2	85 +/- 8%	-	280	280	0	0	yes	-	tgu-miR-204	-	-	uucccuuugucauccuaugcc	cugggaaggcaaagggacgu	uucccuuugucauccuaugccugagaauauaugaagggggcugggaaggcaaagggacgu
chr2_2342	5.2	85 +/- 8%	-	70287	70150	0	137	yes	-	tgu-miR-1662	-	-	uugacaucaucauacuuggga	ucccaagcaggcugaugucaggc	uugacaucaucauacuugggauguaugacacaaagucccaagcaggcugaugucaggc
chr2_4606	5.2	85 +/- 8%	-	70287	70150	0	137	yes	-	tgu-miR-1662	-	-	uugacaucaucauacuuggga	ucccaagcaggcugaugucaggc	uugacaucaucauacuugggauguaugacacaaagucccaagcaggcugaugucaggc
chr1_1591	5.2	85 +/- 8%	-	11482	11381	0	101	yes	-	tgu-miR-20a-5p	-	-	uaaagugcuuauagugcagguag	acugcauuauaagcacuuaaag	uaaagugcuuauagugcagguaguguucacuaaucuacugcauuauaagcacuuaaag
chr1_638	5.1	85 +/- 8%	-	607	607	0	0	yes	-	tgu-miR-155-5p	-	-	uuaaugcuaaucgugauaggggu	uccuacauguuagcauuaaca	uuaaugcuaaucgugauagggguuuuuaccucugaaugacuccuacauguuagcauuaaca
chr33_8426	5.1	85 +/- 8%	-	13	13	0	0	yes	-	tgu-miR-196	-	-	uagguaguuucauguuguuggga	ucggcaacaagaaacugccuuaa	uagguaguuucauguuguugggauuggcuuuuagcucggcaacaagaaacugccuuaa
chr20_2895	5.1	85 +/- 8%	-	1750	1620	0	130	yes	-	tgu-miR-499-5p	-	-	uuaagacuuguagugauguu	aacaucacuuuaagucugugc	uuaagacuuguagugauguuuagauaauguauuacaugaacaucacuuuaagucugugc
chr8_11205	5.1	85 +/- 8%	-	187932	145810	0	42122	yes	-	tgu-miR-199-3p	-	-	acaguagucugcacauuggu	cccaguguucagacuaccuguuc	cccaguguucagacuaccuguucaggacaaugcuguuguacaguagucugcacauuggu
chr3_7922	5.1	85 +/- 8%	-	39	39	0	0	yes	-	tgu-miR-133-3p	-	-	uuugguccccuucaaccagc	uggucaaacggaaccaagcc	uggucaaacggaaccaagcccgucuucuucggagguuugguccccuucaaccagc
chr20_5533	5.1	85 +/- 8%	-	1750	1620	0	130	yes	-	tgu-miR-499-5p	-	-	uuaagacuuguagugauguu	aacaucacuuuaagucugugc	uuaagacuuguagugauguuuagauaauguauuacaugaacaucacuuuaagucugugc
chr33_8428	5.1	85 +/- 8%	-	141	139	0	2	yes	-	tgu-miR-10a-5p	-	-	uacccuguagacucgaauuug	caaauucgucucuagggaa	uacccuguagacucgaauuugugugagcgucuccgagucgcaaauucgucucuagggaa
chrZ_12575	5	85 +/- 8%	-	244838	244724	0	114	yes	-	tgu-miR-101-3p	-	-	guacaguacugugauaacuga	ucgguuaucaugguaccggugc	ucgguuaucaugguaccggugcuguauacgugaaagguacaguacugugauaacuga
chr4_9527	5	85 +/- 8%	-	816	813	0	3	yes	-	tgu-miR-218-5p	-	-	uugugcuugaucuaaccaug	caugguucugucaagcacca	uugugcuugaucuaaccaugugguugugagguaugaguaaaacaugguucugucaagcacca
chr10_1862	5	85 +/- 8%	-	276	276	0	0	yes	-	tgu-miR-204	-	-	uucccuuugucauccuaugcc	cagggacagcaaagggaugc	uucccuuugucauccuaugccuggagaucacagugaggcagggacagcaaagggaugc
chr4_9123	5	85 +/- 8%	-	9598	9583	0	15	yes	-	tgu-miR-15a-5p	-	-	uagcagcacaucaugguuug	cagaccauucugggcugccuca	uagcagcacaucaugguuuguagggacaaggagauacagaccauucugggcugccuca
chr1_1590	5	85 +/- 8%	-	9918	9918	0	0	yes	-	tgu-miR-19b-3p	-	-	ugugcaaauccaugcaaaac	uuugcagguuugcauccagc	uuugcagguuugcauccagcuguaugauacucugcugugcaaauccaugcaaaac
chr1_1594	5	85 +/- 8%	-	4275	4275	0	0	yes	-	tgu-miR-19b-3p	-	-	ugugcaaaucuaugcaaaac	uuugcauaguugcacuac	uuugcauaguugcacuacaggaagaauguaguugugcaaaucuaugcaaaac
chr26_3216	4.9	81 +/- 9%	-	68057	68004	0	53	yes	-	tgu-miR-29a-3p	-	-	uagcaccauuugaaaucgguua	ugaccgauuucucuugguguuc	ugaccgauuucucuugguguucagagucucaguuucugucuagcaccauuugaaaucgguua
chr17_3719	4.9	81 +/- 9%	-	187245	145123	0	42122	yes	-	tgu-miR-199-3p	-	-	acaguagucugcacauuggu	cccaguguucagacuaccuguuc	cccaguguucagacuaccuguucaggacuacgagauuguacaguagucugcacauuggu
chr7_11109	4.9	81 +/- 9%	-	756	756	0	0	yes	-	tgu-miR-10a-5p	-	-	uacccuguagaaccgaauuug	gauucgauucuaggggaaua	uacccuguagaaccgaauuugugugauauucauauagucacagauucgauucuaggggaaua
chr26_6328	4.9	81 +/- 9%	-	68057	68004	0	53	yes	-	tgu-miR-29a-3p	-	-	uagcaccauuugaaaucgguua	ugaccgauuucucuugguguuc	ugaccgauuucucuugguguucagagucucaguuucugucuagcaccauuugaaaucgguua
chr17_1979	4.9	81 +/- 9%	-	187245	145123	0	42122	yes	-	tgu-miR-199-3p	-	-	acaguagucugcacauuggu	cccaguguucagacuaccuguuc	cccaguguucagacuaccuguucaggacuacgagauuguacaguagucugcacauuggu
chr28_6763	4.8	81 +/- 9%	-	227	227	0	0	yes	-	tgu-miR-7-5p	-	-	uggaagacuagugauuuuguugu	aacaaaucauagccugccaua	uggaagacuagugauuuuguuguuaugauuuauaaaggugacaacaaaucauagccugccaua
chr4_9110	4.8	81 +/- 9%	-	9658	9634	1	23	yes	-	tgu-miR-363-3p	-	-	aauugcacgguauccaucugua	guggaucacgaugcaauuuuga	guggaucacgaugcaauuuugauuaguuuaguaggagaaaaauugcacgguauccaucugua
chr17_2018	4.8	81 +/- 9%	-	5100	5099	0	1	yes	-	tgu-miR-181a-5p	-	-	aacauucauugcugucgguggg	cucacugaucaaugaaugca	aacauucauugcugucgguggguuuucauugcuaucaacucacugaucaaugaaugca
chr17_3764	4.8	81 +/- 9%	-	5100	5099	0	1	yes	-	tgu-miR-181a-5p	-	-	aacauucauugcugucgguggg	cucacugaucaaugaaugca	aacauucauugcugucgguggguuuucauugcuaucaacucacugaucaaugaaugca
chr9_12029	4.7	81 +/- 9%	-	7568	7558	0	10	yes	-	tgu-miR-15a-5p	-	-	uagcagcacaucaugguuug	cgaaucauuauuugcugcuuua	uagcagcacaucaugguuugcaugcuguagugaagaugcgaaucauuauuugcugcuuua
chr1_1663	4.7	81 +/- 9%	-	53482	53456	1	25	yes	-	tgu-miR-15a-5p	-	-	uagcagcacguaaauauugg	ccaguauuaacugugcugcuga	uagcagcacguaaauauugguguuaaaacuguaaauaucuccaguauuaacugugcugcuga
chr3_7498	4.7	81 +/- 9%	-	4274	4274	0	0	yes	-	tgu-miR-456-3p	-	-	caggcugguuagaugguuguc	caggcaucuucucagccuacaugug	caggcaucuucucagccuacauguggauuccuaaaucugcaggcugguuagaugguuguc
chr3_6942	4.7	81 +/- 9%	-	118	118	0	0	yes	-	tgu-miR-194-5p	-	-	uguaacagcaacuccaug	uggagaugcuguuacuuu	uguaacagcaacuccauguggacuacacugacuuccaguggagaugcuguuacuuu
chr19_4510	4.6	81 +/- 9%	-	10481	10472	0	9	yes	-	tgu-miR-130a-3p	-	-	cagugcaauaguauugucaaagc	gcucugacuuuauugcacuac	gcucugacuuuauugcacuacuguacuucacagcuagcagugcaauaguauugucaaagc
chr3_7326	4.6	81 +/- 9%	-	99	99	0	0	yes	-	tgu-miR-1329-5p	-	-	uacagugaucacguuacga	guagcuugaucacgauauc	uacagugaucacguuacgauggauuucucaaguaacaaccucguagcuugaucacgauauc
chr27_6460	4.6	81 +/- 9%	-	154560	152857	0	1703	yes	-	tgu-miR-10a-5p	-	-	uacccuguagauccgaauuug	caaauucguaucuaggggaa	uacccuguagauccgaauuuguguaaaggaaguugggucacaaauucguaucuaggggaa
chr19_2322	4.6	81 +/- 9%	-	10481	10472	0	9	yes	-	tgu-miR-130a-3p	-	-	cagugcaauaguauugucaaagc	gcucugacuuuauugcacuac	gcucugacuuuauugcacuacuguacuucacagcuagcagugcaauaguauugucaaagc
chr3_7269	4.6	81 +/- 9%	-	7	6	0	1	yes	-	-	-	-	cggccauguugucugugggcuc	acccacaaacaacauggcggc	acccacaaacaacauggcggcugugguuacaggcggccauguugucugugggcuc
chr3_7413	4.6	81 +/- 9%	-	39	39	0	0	yes	-	tgu-miR-216b-5p	-	-	aaaucucugcaggcaaauguga	acaauuaccuguagagauucu	aaaucucugcaggcaaaugugaugucuuuauagcaaucucacaauuaccuguagagauucu
chr27_3252	4.6	81 +/- 9%	-	154560	152857	0	1703	yes	-	tgu-miR-10a-5p	-	-	uacccuguagauccgaauuug	caaauucguaucuaggggaa	uacccuguagauccgaauuuguguaaaggaaguugggucacaaauucguaucuaggggaa
chr9_12027	4.5	81 +/- 9%	-	53490	53476	0	14	yes	-	tgu-miR-15a-5p	-	-	uagcagcacguaaauauugg	ccaauauuauugugcugcuua	uagcagcacguaaauauugguguaguaaaauaaaccuuaaaccccaauauuauugugcugcuua
chr3_7261	4.5	81 +/- 9%	-	51760	51760	0	0	yes	-	tgu-miR-30b-5p	-	-	uguaaacauccucgacuggaagc	aaacagcugaggaauguguauugcugu	aaacagcugaggaauguguauugcuguugacagugagcgacuguaaacauccucgacuggaagc
chr8_11192	4.5	81 +/- 9%	-	5115	5096	0	19	yes	-	tgu-miR-181a-5p	-	-	aacauucauugcugucgguggg	cucacugaacaaugaaugcaa	aacauucauugcugucgguggguuuaacuauguggacaagcucacugaacaaugaaugcaa
chr24_3082	4.4	81 +/- 9%	-	362343	362153	0	190	yes	-	tgu-miR-100-5p	-	-	aacccguagauccgaacuug	caagcuuguaucuauaggua	aacccguagauccgaacuuguggucauauuccacacaagcuuguaucuauaggua
chr17_2016	4.4	81 +/- 9%	-	56402	56352	0	50	yes	-	tgu-miR-181a-5p	-	-	aacauucaacgcugucggugag	accaucgaccguugacuguacc	aacauucaacgcugucggugaguuugagaacuaagaaaaaccaucgaccguugacuguacc
chr24_5936	4.4	81 +/- 9%	-	362343	362153	0	190	yes	-	tgu-miR-100-5p	-	-	aacccguagauccgaacuug	caagcuuguaucuauaggua	aacccguagauccgaacuuguggucauauuccacacaagcuuguaucuauaggua
chr1_1665	4.4	81 +/- 9%	-	18036	17995	0	41	yes	-	tgu-miR-15a-5p	-	-	uagcagcacauaaugguuug	caggccauauugugcugccuc	uagcagcacauaaugguuuguggguuuugaaaaggugcaggccauauugugcugccuc
chr17_3762	4.4	81 +/- 9%	-	56402	56352	0	50	yes	-	tgu-miR-181a-5p	-	-	aacauucaacgcugucggugag	accaucgaccguugacuguacc	aacauucaacgcugucggugaguuugagaacuaagaaaaaccaucgaccguugacuguacc
chrZ_12895	4.3	81 +/- 9%	-	10	10	0	0	yes	-	tgu-miR-34b	-	-	aggcaguguauuguuaguuagc	caacuaacuacacugccaca	aggcaguguauuguuaguuagcugcucuucauacaccagcaacuaacuacacugccaca
chr8_11190	4.2	81 +/- 9%	-	57176	56351	0	825	yes	-	tgu-miR-181a-5p	-	-	aacauucaacgcugucggugag	accaucgaccguugauuguacc	aacauucaacgcugucggugaguuuggaauuuaagugaaaaccaucgaccguugauuguacc
chr7_10999	4.1	81 +/- 9%	-	3925	3916	0	9	yes	-	tgu-miR-1559	-	-	uucgaugcuuguaugcuacucc	uuacauguaugcaucgagcaga	uucgaugcuuguaugcuacucccaagaaugcuaacaggaguuacauguaugcaucgagcaga
chr3_7026	3.8	61 +/- 13%	-	6	4	0	2	yes	-	-	-	-	acucucuaaccugacagaaaac	uuccugucugcucagggaguua	acucucuaaccugacagaaaacuaucuacuuuucuagguuaguuuccugucugcucagggaguua
chr3_6944	3.7	61 +/- 13%	-	972	972	0	0	yes	-	tgu-miR-215-5p	-	-	augaccuaugaauugacagac	cugucauuucuauaggccaaua	augaccuaugaauugacagacugcuuucaaaaugugccugucauuucuauaggccaaua
chr1_833	3.2	61 +/- 13%	-	27	27	0	0	yes	-	tgu-miR-223	-	-	ugucaguuugucaaauac	cuuuggcaagacaac	cuuuggcaagacaacccagcaugcagaacacuuacucaggauagugagaguuuccugcuuagcuuugucaguuugucaaauac
chr2_2635	2.8	63 +/- 10%	-	8	8	0	0	yes	-	tgu-miR-196	-	-	uagguaguuucauguugu	agcacgaaacugccuuaa	uagguaguuucauguuguuggggcuccaccuuucucucuacagcacgaaacugccuuaa
chr2_5059	2.8	63 +/- 10%	-	8	8	0	0	yes	-	tgu-miR-196	-	-	uagguaguuucauguugu	agcacgaaacugccuuaa	uagguaguuucauguuguuggggcuccaccuuucucucuacagcacgaaacugccuuaa
chr9_12006	2.8	63 +/- 10%	-	21	21	0	0	yes	-	-	-	-	cgaaaggcuguaaaucaccccc	gggugauuuacagcccuucggc	gggugauuuacagcccuucggcggggaacuuccccucugcgcggccgaaaggcuguaaaucaccccc
chr27_3250	2.7	63 +/- 10%	-	8	8	0	0	yes	-	tgu-miR-196	-	-	uagguaguuucauguugu	aacaucaaacuaccugau	uagguaguuucauguuguugggcuuuaaauuuuaaacacaagaacaucaaacuaccugau
chr3_7257	2.7	63 +/- 10%	-	23	22	0	1	yes	-	-	-	-	cggacgaggcuucccgcgcug	ccgcgcgggaagccucggccga	ccgcgcgggaagccucggccgacgagcaaccggcggacgaggcuucccgcgcug
chr27_6458	2.5	63 +/- 10%	-	8	8	0	0	yes	-	tgu-miR-196	-	-	uagguaguuucauguugu	aacaucaaacuaccugau	uagguaguuucauguuguugggcuuuaaauuuuaaacacaagaacaucaaacuaccugau
chr5_10263	2.5	63 +/- 10%	-	10	8	0	2	no	-	-	-	-	cggggcggcugugagcugagc	cccggcuuccugccgcccugg	cggggcggcugugagcugagcugcacggugacggcccggcuuccugccgcccugg
chr5_9904	2.4	63 +/- 10%	-	10	5	0	5	no	-	-	-	-	uugacagccaggacgacccugcc	aggcgggcuggaugucaacagc	uugacagccaggacgacccugccgcaguacagccccaggcaggcgggcuggaugucaacagc
chr2_5226	2.3	63 +/- 10%	-	16	16	0	0	yes	-	-	-	-	cuucccuccgucggcgcgcac	gcgcggcgcggagggagcggg	gcgcggcgcggagggagcgggcggugaauugcccccuucccuccgucggcgcgcac
chr19_2239	2.3	63 +/- 10%	-	7	7	0	0	yes	-	tgu-miR-19b-3p	-	-	agugcaaauuaugaauaa	gauucauucuuugcucuuc	gauucauucuuugcucuucuaauuauaagaggaagugcaaauuaugaauaa
chr19_4357	2.3	63 +/- 10%	-	7	7	0	0	yes	-	tgu-miR-19b-3p	-	-	agugcaaauuaugaauaa	gauucauucuuugcucuuc	gauucauucuuugcucuucuaauuauaagaggaagugcaaauuaugaauaa
chr17_3661	2.2	63 +/- 10%	-	83	81	0	2	yes	-	-	-	-	ucuccagucugaaucaguccugc	gacugauucagacuggagaa	gacugauucagacuggagaagggaauggagguucucuucuccagucugaaucaguccugc
chr17_1955	2.2	63 +/- 10%	-	83	81	0	2	yes	-	-	-	-	ucuccagucugaaucaguccugc	gacugauucagacuggagaa	gacugauucagacuggagaagggaauggagguucucuucuccagucugaaucaguccugc
chr7_11004	2.2	63 +/- 10%	-	25	25	0	0	yes	-	-	-	-	cccggccgccccccguccc	ggcuggcggggcgggccgagggc	ggcuggcggggcgggccgagggcuuuucccggccgccccccguccc
chr4_9354	2.1	63 +/- 10%	-	15	11	0	4	yes	-	-	-	-	ccaaagguggcucgcggaacug	uccgcgaaccgcccucggucgc	uccgcgaaccgcccucggucgcggugucugcggagaccaaagguggcucgcggaacug
chr6_10473	2.1	63 +/- 10%	-	33	33	0	0	no	-	tgu-miR-2981	-	-	ccgggccggcgccccgcc	cgggcgccgugugcggag	cgggcgccgugugcggagcgcugcgcgcaccgcggagcugcgcggagcggccccgcugcgcugcgccccgggccggcgccccgcc
chr1_568	2.1	63 +/- 10%	-	15	15	0	0	yes	-	-	-	-	ccccgccuccgccucccc	cgaggcggaggaguu	ccccgccuccgccuccccgcgcugaggcggccaacgggcucacccuccccgccccgcccggcccgaggcggaggaguu
chr2_2624	2	63 +/- 10%	-	2	1	0	1	yes	-	-	-	-	ucugccagauagggcucagguac	uuccucagcccuguggcagacug	ucugccagauagggcucagguaccugcagcugucuccuggcggguuccucagcccuguggcagacug
chr3_7030	2	63 +/- 10%	-	87	87	0	0	yes	-	-	-	-	cgccgcuguccggccggggc	cgcgccgcucggcggcguu	cgccgcuguccggccggggcgggugccgcgccgcucggcggcguu
chr1_1029	1.9	67 +/- 7%	-	53	53	0	0	yes	-	-	-	-	uuuggcacuagcacauuuuugc	aauuauguguagugccaauau	uuuggcacuagcacauuuuugcuuugcuuuauguguuuugagcaauuauguguagugccaauau
chrUn_NW_020110164v1_12338	1.9	67 +/- 7%	-	15	10	0	5	yes	-	-	-	-	uagacaccccauagaccucca	gucucuauggcguuucuaugggg	gucucuauggcguuucuaugggguuccuguguacccauagacaccccauagaccucca
chr5_9720	1.9	67 +/- 7%	-	882	685	0	197	yes	-	-	-	-	gagccacugacuaacgcacau	cugugcgugugacagcggcuaa	gagccacugacuaacgcacauugugcucucggcgacuccacugugcgugugacagcggcuaa
chr20_5520	1.9	67 +/- 7%	-	13	13	0	0	yes	-	-	-	-	ugggcagccucucagugagcuc	gcucucuguggcucagcccagc	gcucucuguggcucagcccagcugcgguacugcauggugcugggcagccucucagugagcuc
chr1_341	1.9	67 +/- 7%	-	28	28	0	0	yes	-	-	-	-	uuaugcuucugaaugccuu	ggcagucaggagccuaauu	ggcagucaggagccuaauuccuuucuagaaugagauuuaugcuucugaaugccuu
chr1_1386	1.8	67 +/- 7%	-	305	305	0	0	yes	-	-	-	-	aaacacuacccugagcugcucc	agcagcccugugauagcuguuugc	agcagcccugugauagcuguuugcugcuaaccugcaaacacuacccugagcugcucc
chr2_4588	1.8	67 +/- 7%	-	150	150	0	0	yes	-	-	-	-	gaugaaaucccccuauggccug	ggauagguggguuucauuga	gaugaaaucccccuauggccuguuugugaugguaccgcaggauagguggguuucauuga
chr2_2340	1.8	67 +/- 7%	-	150	150	0	0	yes	-	-	-	-	gaugaaaucccccuauggccug	ggauagguggguuucauuga	gaugaaaucccccuauggccuguuugugaugguaccgcaggauagguggguuucauuga
chr10_1871	1.8	67 +/- 7%	-	5	4	0	1	yes	-	tgu-miR-1744	-	-	acuucaacaggagcaagacuga	gcucuguugaacucaaaa	gcucuguugaacucaaaagcugaacccuguuguugacuucaacaggagcaagacuga
chr6_10492	1.7	67 +/- 7%	-	24	24	0	0	yes	-	-	-	-	augugcuggagaugaagc	cuccucuccaucacucugc	augugcuggagaugaagcuggagcuccucuccaucacucugcagcuccucuccaucacucugc
chr18_4161	1.7	67 +/- 7%	-	198	198	0	0	no	-	tgu-miR-137-3p	-	-	uuauugcuggagaauacgcguag	acggguauucucgggcggauaaca	acggguauucucgggcggauaacacggccgcgcuguuauugcuggagaauacgcguag
chrUn_NW_020110165v1_12354	1.7	67 +/- 7%	-	66	61	0	5	yes	-	-	-	-	ucucuauugggucucuaugggg	auggggucucuauggggucu	auggggucucuauggggucucuguauggggucucucuaugggucucucuaugggucucuauugggucucuaugggg
chr19_2251	1.7	67 +/- 7%	-	205904	199448	0	6456	yes	-	-	-	-	cauaaaguagaaagcacuac	guaguguuuccuacuuua	cauaaaguagaaagcacuacuaaacagcacugcaggguguaguguuuccuacuuua
chrZ_12944	1.7	67 +/- 7%	-	41	41	0	0	yes	-	-	-	-	ugcagccuggccguaucucag	ggugauacgggagcaaggcugcaua	ggugauacgggagcaaggcugcauacuugaaccuuaguucuuugcagccuggccguaucucag
chr19_4393	1.7	67 +/- 7%	-	205904	199448	0	6456	yes	-	-	-	-	cauaaaguagaaagcacuac	guaguguuuccuacuuua	cauaaaguagaaagcacuacuaaacagcacugcaggguguaguguuuccuacuuua
chr25_6086	1.7	67 +/- 7%	-	1029	1027	1	1	yes	-	-	-	-	cugcauacgaguagacccuuuc	ggggacaauguaugcaacagcaaag	cugcauacgaguagacccuuucugacucugccuguagucguaaaggggggacaauguaugcaacagcaaag
chr25_3138	1.7	67 +/- 7%	-	1029	1027	1	1	yes	-	-	-	-	cugcauacgaguagacccuuuc	ggggacaauguaugcaacagcaaag	cugcauacgaguagacccuuucugacucugccuguagucguaaaggggggacaauguaugcaacagcaaag
chr21_2926	1.6	67 +/- 7%	-	14	14	0	0	yes	-	-	-	-	ucaagcaggcaaguauuuc	acugcuugcauguuuaaca	ucaagcaggcaaguauuucugcugacccugcggaacugcuugcauguuuaaca
chrW_12371	1.6	67 +/- 7%	-	64	64	0	0	yes	-	-	-	-	cgggucccaucuggggugcca	gcauccccucucagccggaccugca	gcauccccucucagccggaccugcagcugaacagagcgggucccaucuggggugcca
chrW_12369	1.6	67 +/- 7%	-	64	64	0	0	yes	-	-	-	-	cgggucccaucuggggugcca	gcauccccucucagccggaccugca	gcauccccucucagccggaccugcagcugaacagagcgggucccaucuggggugcca
chrW_12416	1.6	67 +/- 7%	-	64	64	0	0	yes	-	-	-	-	cgggucccaucuggggugcca	gcauccccucucagccggaccugca	gcauccccucucagccggaccugcagcugaacagagcgggucccaucuggggugcca
chr2_2660	1.6	67 +/- 7%	-	20	19	1	0	yes	-	-	-	-	uuugauagcagcccugccacaugc	cuguuggcagggugcuugcuaaug	cuguuggcagggugcuugcuaaugccaggagaggagcugccucuaugauuggaguuugauagcagcccugccacaugc
chrW_12420	1.6	67 +/- 7%	-	64	64	0	0	yes	-	-	-	-	cgggucccaucuggggugcca	gcauccccucucagccggaccugca	gcauccccucucagccggaccugcagcugaacagagcgggucccaucuggggugcca
chr21_5598	1.6	67 +/- 7%	-	14	14	0	0	yes	-	-	-	-	ucaagcaggcaaguauuuc	acugcuugcauguuuaaca	ucaagcaggcaaguauuucugcugacccugcggaacugcuugcauguuuaaca
chr9_11870	1.6	67 +/- 7%	-	15	15	0	0	yes	-	-	-	-	ucuucucucugucuuucucag	ggggaggauagggagaaaggg	ggggaggauagggagaaagggugcugcacguccccugggucuuaauucuucucucugucuuucucag
chr3_7271	1.6	67 +/- 7%	-	14	14	0	0	yes	-	-	-	-	auggcuguucuagcaguagauc	ccuacugcuagguuugcccuua	ccuacugcuagguuugcccuuaaacuauggugcucucuuaauggcuguucuagcaguagauc
chr28_6727	1.6	67 +/- 7%	-	46	46	0	0	yes	-	-	-	-	uuggggacaccaucagaacagcc	cacugauguguucuccacagg	uuggggacaccaucagaacagccacagcugugcuggauucuguggcacugauguguucuccacagg
chrUn_NW_020110165v1_12348	1.5	67 +/- 7%	-	15	15	0	0	yes	-	-	-	-	uuuggacccaauucgauuugga	cgguucuauuuggacccaauuc	cgguucuauuuggacccaauucaguuuggacccaauucgauuugga
chr8_11344	1.5	67 +/- 7%	-	12	12	0	0	yes	-	-	-	-	cugcacuggucauugacua	gucucauucuagugcaaga	cugcacuggucauugacuagcuggucuuucccugaccuccuggucucauucuagugcaaga
chr17_3750	1.5	67 +/- 7%	-	266	266	0	0	yes	-	-	-	-	caugccccagucguguugcaga	ugugucauuagguggcagaaagga	caugccccagucguguugcagauauggcuguagugccauguuugugucauuagguggcagaaagga
chr3_7019	1.5	67 +/- 7%	-	11	11	0	0	yes	-	-	-	-	ugccucuuugucuaucugcag	gcagguaggcagggggagcagg	gcagguaggcagggggagcaggcugugugcugguugccuaccgucugccucuuugucuaucugcag
chr17_2004	1.5	67 +/- 7%	-	266	266	0	0	yes	-	-	-	-	caugccccagucguguugcaga	ugugucauuagguggcagaaagga	caugccccagucguguugcagauauggcuguagugccauguuugugucauuagguggcagaaagga
chr20_5473	1.5	67 +/- 7%	-	15	15	0	0	yes	-	-	-	-	gaauguaaagaaguaugua	cauacuucuuuauaugccca	cauacuucuuuauaugcccauaugaaccuggcaaucuauggaauguaaagaaguaugua
chr4_9021	1.4	67 +/- 7%	-	86	86	0	0	yes	-	-	-	-	ucagaaggcugcguguuc	acagugguuuacugaca	acagugguuuacugacagucuauacuauauauauauuuguauguauacuggccguauaugcuguaucagaaggcugcguguuc
chr6_10527	1.4	67 +/- 7%	-	139	139	0	0	yes	-	-	-	-	cuccagugguagucagcugucc	gcgguguuacacugcugggaaa	cuccagugguagucagcuguccagggcaauacugugccugaggcgguguuacacugcugggaaa
chrUn_NW_020110165v1_12353	1.4	67 +/- 7%	-	61	61	0	0	yes	-	-	-	-	ucucuauugggucucuaugggg	cuaugagucucucuauggggucu	ucucuauugggucucuauggggucucucuaugggucucucuauaggucucuaugagucucucuauggggucu
chr1_1027	1.4	67 +/- 7%	-	799	799	0	0	yes	-	-	-	-	uuuggcaaugguagaacucacac	gguucuagacuugccaacua	uuuggcaaugguagaacucacacuggugcgcucgcaggauccggugguucuagacuugccaacua
chr5_9634	1.3	67 +/- 7%	-	14	14	0	0	yes	-	-	-	-	uuugaggcucgcgcaauucc	guuugcugucagccucauagagc	uuugaggcucgcgcaauuccaaaccugacagugguucugguuugcugucagccucauagagc
chr2_2475	1.3	67 +/- 7%	-	69	69	0	0	yes	-	-	-	-	aaacauucauuggagcagggac	cccuucuccaaaugaauuuuuaa	cccuucuccaaaugaauuuuuaauagaaaauaauuaaacauucauuggagcagggac
chr4_9507	1.3	67 +/- 7%	-	46	46	0	0	yes	-	-	-	-	ugcugccagauagaaguucacc	uggcuuccauaugguauggagc	ugcugccagauagaaguucaccuuuuccuauagcuuggguggcuuccauaugguauggagc
chr2_4791	1.3	67 +/- 7%	-	69	69	0	0	yes	-	-	-	-	aaacauucauuggagcagggac	cccuucuccaaaugaauuuuuaa	cccuucuccaaaugaauuuuuaauagaaaauaauuaaacauucauuggagcagggac
chrW_12409	1.3	67 +/- 7%	-	216	216	0	0	yes	-	-	-	-	cgguccucacacggggcacca	uagccaccuguguuaggccucu	cgguccucacacggggcaccauuuguugcuuucugcaacaaugauguuagccaccuguguuaggccucu
chr19_4460	1.2	67 +/- 7%	-	1337	636	0	701	no	-	tgu-miR-132	-	-	uaacagucuacagucauggc	accuuggcucuagacugcuuac	accuuggcucuagacugcuuacugcugcguagggacaggacaguaacagucuacagucauggc
chr5_9670	1.2	67 +/- 7%	-	724	724	0	0	yes	-	-	-	-	augcacuguucguaaccugu	ggguuccauuccggugcuaca	augcacuguucguaaccuguuagcaguguaauucuguuaacggguuccauuccggugcuaca
chr19_2286	1.2	67 +/- 7%	-	1337	636	0	701	no	-	tgu-miR-132	-	-	uaacagucuacagucauggc	accuuggcucuagacugcuuac	accuuggcucuagacugcuuacugcugcguagggacaggacaguaacagucuacagucauggc
chr8_11303	1.2	67 +/- 7%	-	58	58	0	0	yes	-	-	-	-	uuucugggacauuucauc	ugaaguuuccagccaagg	ugaaguuuccagccaaggcugcaaggcuggagcagccuuucugggacauuucauc
chr2_5248	1.2	67 +/- 7%	-	15	15	0	0	yes	-	-	-	-	gaauguaaagaaguaugua	cauacuucuuuauguaccca	cauacuucuuuauguacccauaugaacauacaaugcuauggaauguaaagaaguaugua
chr2_5292	1.1	67 +/- 7%	-	10	10	0	0	yes	-	-	-	-	cagggagauguaccuguaggag	ccugcagcugcauuuucccugug	ccugcagcugcauuuucccugugugacccgcuagcacagggagauguaccuguaggag
chr23_3022	1.1	67 +/- 7%	-	13	13	0	0	yes	-	-	-	-	uggcgaugaugacacacuugcc	caggugugaugucugcaga	caggugugaugucugcagaaguaaagaagcacugugugugucuuuaugggucuggcgaugaugacacacuugcc
chrUn_NW_020110165v1_12351	1	67 +/- 7%	-	15	15	0	0	yes	-	-	-	-	uuuggacccaauucgauuugga	caauuugauuuugauccgguucuguuu	uuuggacccaauucgauuuggacccaauuugauuuggacccaauuugauuuugauccgguucuguuu
chr19_2237	1	67 +/- 7%	-	11	11	0	0	yes	-	-	-	-	uugguggcugcaugcucucagc	ugagggcagagcugcagccucacauuu	ugagggcagagcugcagccucacauuucuucuuuuguuggacuugguggcugcaugcucucagc
chrZ_12676	1	67 +/- 7%	-	11	11	0	0	yes	-	-	-	-	cgggccucacacggggcacca	uagccaccuguguuaggccucug	cgggccucacacggggcaccauuucuugcuuucugcaacaacgauguuagccaccuguguuaggccucug
chr19_4351	1	67 +/- 7%	-	11	11	0	0	yes	-	-	-	-	uugguggcugcaugcucucagc	ugagggcagagcugcagccucacauuu	ugagggcagagcugcagccucacauuucuucuuuuguuggacuugguggcugcaugcucucagc
chr17_1953	0.8	8 +/- 8%	-	9	7	0	2	yes	-	-	-	-	ccaucuccaccagcagcacug	cagugccgacguguggggaugcgc	cagugccgacguguggggaugcgccguggggcagagcccaucuccaccagcagcacug
chr26_6270	0.8	8 +/- 8%	-	231823	231815	8	0	no	-	tgu-let-7i-5p	-	-	ugagguaguagguuguauagu	cagggaaucacaccagacc	cagggaaucacaccagaccucuguacugcucuguggaggugagguaguagguuguauagu
chr26_3194	0.8	8 +/- 8%	-	231823	231815	8	0	no	-	tgu-let-7i-5p	-	-	ugagguaguagguuguauagu	cagggaaucacaccagacc	cagggaaucacaccagaccucuguacugcucuguggaggugagguaguagguuguauagu
chr17_3659	0.8	8 +/- 8%	-	9	7	0	2	yes	-	-	-	-	ccaucuccaccagcagcacug	cagugccgacguguggggaugcgc	cagugccgacguguggggaugcgccguggggcagagcccaucuccaccagcagcacug
chrZ_12897	0.7	8 +/- 8%	-	3	3	0	0	yes	-	tgu-miR-34b	-	-	uggcaguguauguuagcugg	agcuaacacgcaguugcuaac	uggcaguguauguuagcugguugaaacucuugacaucagcuaacacgcaguugcuaac
chr5_9672	0.7	8 +/- 8%	-	43	43	0	0	yes	-	-	-	-	ucgcacugcucguaaccuuu	agguuccauuccagugcuaca	ucgcacugcucguaaccuuuugacagcauauuccugugaauagguuccauuccagugcuaca
chr24_3069	0.7	8 +/- 8%	-	10	10	0	0	yes	-	-	-	-	ucuucuccuuccucaccccag	ggaaaaaggaagagggggugg	ggaaaaaggaagaggggguggugagugggaacgggaguaucuaaaugccucuucuccuuccucaccccag
chr3_6939	0.6	8 +/- 8%	-	9	9	0	0	yes	-	-	-	-	auggugcggguggcgcgcggggc	cucccgccccgcccccgcagagccguac	cucccgccccgcccccgcagagccguacauuuacgcgguagcaaaagagaaaguaaggaggauggugcggguggcgcgcggggc
chr9_11876	0.6	8 +/- 8%	-	9	9	0	0	yes	-	-	-	-	ugcugcugaacaccacagac	cugcugaugggcagcagcugg	cugcugaugggcagcagcuggcaccuggcauccaaggggccugcugcugaacaccacagac
chr2_2650	0.5	8 +/- 8%	-	9	9	0	0	yes	-	-	-	-	ggagcggaaugugcagccucac	gagcugcacauuucguguccca	gagcugcacauuucgugucccaccucaugcugcugggagcggaaugugcagccucac
chr2_5084	0.5	8 +/- 8%	-	9	9	0	0	yes	-	-	-	-	ggagcggaaugugcagccucac	gagcugcacauuucguguccca	gagcugcacauuucgugucccaccucaugcugcugggagcggaaugugcagccucac
chrZ_12462	0.5	8 +/- 8%	-	12	11	0	1	yes	-	-	-	-	ucuucccucagccaggcuuga	ccaagccucccagggaagaagg	ucuucccucagccaggcuugacuacaagaccucaaugagccaagccucccagggaagaagg
chr7_11185	0.4	8 +/- 8%	-	8	8	0	0	yes	-	-	-	-	caggagcgccucugagcucccc	ggaguucagcugugcugcugca	caggagcgccucugagcuccccucugcuuccagggggaguucagcugugcugcugca
chrW_12421	0.3	8 +/- 8%	-	216	216	0	0	yes	-	-	-	-	cgguccucacacggggcacca	uagccaccuguguuagcccuu	cgguccucacacggggcaccauuuguugcuuucugcaacaacgauguuagccaccuguguuagcccuu
chrZ_13102	0.3	8 +/- 8%	-	34	34	0	0	no	-	tgu-miR-31	-	-	aggcaagauguuggcauagc	uccuacagauggcuuuc	uccuacagauggcuuucuaacaaguucuuucaugcagagcuggaggggaggcaagauguuggcauagc
chr19_4258	0.2	8 +/- 8%	-	6	4	0	2	no	-	-	-	-	ugagccggaagggccggcagc	ugccaguccugccagucucgug	ugagccggaagggccggcagcaguuucucccgcucacugccaguccugccagucucgug
chr22_5737	0.2	8 +/- 8%	-	17	17	0	0	yes	-	-	-	-	aagaggauugaauugcaagac	cuuguaauuuuuuccuucuag	aagaggauugaauugcaagacuuuguuuuguuaacaucuuguaauuuuuuccuucuag
chr22_2981	0.2	8 +/- 8%	-	17	17	0	0	yes	-	-	-	-	aagaggauugaauugcaagac	cuuguaauuuuuuccuucuag	aagaggauugaauugcaagacuuuguuuuguuaacaucuuguaauuuuuuccuucuag
chr4_9328	0.1	8 +/- 8%	-	9	9	0	0	yes	-	-	-	-	cuggaccgcccgcuugguuaga	ugaucaagugguggugacagcu	ugaucaagugguggugacagcuauuucuaaaucugcuggaccgcccgcuugguuaga
chr6_10787	0.1	8 +/- 8%	-	31	31	0	0	yes	-	-	-	-	augcacauuucauugaccugc	aguguuauuucuggugugcuaaa	augcacauuucauugaccugcuuucauugcaagugaugagcaguguuauuucuggugugcuaaa
chr4_9111	0	8 +/- 8%	-	135796	135796	0	0	no	-	tgu-miR-363-3p	-	-	uauugcacuugucccggccug	ggcugcucugcuuggugguugu	uauugcacuugucccggccuguggaggaaaggaggacuggucuucaggcugcucugcuuggugguugu
